# Supplementary material for: HESS Opinions: The Sword of Damocles of the Impossible Flood
Source: Copernicus journal article supplement (doi:10.5194/egusphere-2023-2420), 2023-11-14
Supplement: Supplementary file [file egusphere-2023-2420-AC1-supplement.pdf]

## Reply to referee #1

We thank the Referee for the positive premise of the review. Indeed, it is our aim to present a manuscript that is a “joy to read”, as capturing the interest of the audience is an essential ingredient for disseminating awareness of the risk associated to impossible floods. We appreciate the insightful comments of the Referee, which we individually discuss below along with the proposed changes. Comments of the reviewer are copied in italic, while text that we suggest to amend/add in the manuscript is marked in red.

*Section 2, lines 38-41: The authors state that “communities often design their management strategies based on historical events” and such “impossible events include floods whose probability of occurrence is considered too small to act, but also events that go beyond any imagination.” Additionally, large flood events may be not covered by underlying regulations – the design events authors refer to later on are an example, as e.g. given in the EU Flood Directive (Commission of the European Communities, 2007) and related national law. Authors are kindly requested to make a few statements here.*

We agree that regulations often do not require to assess the risk associated to floods with return period larger than 100-200 years. We recognize in the manuscript that this is one of the reasons why impossible floods are often not perceived as a significant hazard. We agree that a reference to the EU Flood Directive (Commission of the European Communities, 2007) should be included in Section 5. Moreover, we will add the following sentence in the first paragraph of Section 2, between the first and second sentence (line 40):

**“In fact, international and national regulations recommend design recurrence intervals that usually do not exceed 100 or 200 years, while impossible floods are far less frequent. For example, the EU Flood Directive (Commission of the European Communities, 2007) requires member states to map inundation areas for an extreme scenario which has typically a return period of 200 years.”**

*Section 2, line 50f.: The challenge of dynamics in discharge (observation in the past  $\neq$  system behaviour in the future) have been extensively discussed (see e.g., Sofia et al., 2017). The authors may wish to comment on their assumption that this is not considered in contemporary flood risk management, also against previous works of the authors of the present manuscript (Blöschl et al., 2019; Blöschl, 2022).*

We agree that changing dynamics of river discharge may induce underestimation of the risk associated to extreme events. In fact, we already state in line 52 that “However, in reality the future may be quite different from the past, not least because of climate change and our limited knowledge of the past itself.” We will include citations to the relevant literature including Sofia et al. (2017), Blöschl et al. (2019) and Blöschl et al. (2022).

*Section 3, line 140: What is meant here with the term “residual risk”? Failure of technical mitigation? Events larger than expected? The issue of not remembering historical (or even younger) flood events and associated losses has been a topic for decades (Kuhlicke et al., 2020), however, experienced flood damage in the past does not necessarily mean good governance in the future. The authors may wish to comment on these issues specifically in terms of the “recency bias” (line 141).*

We agree that a definition of what we mean by “residual risk” is needed here and change the text of line 136-137 as follows:

**“Single-action bias: Relying on one action, even when this action reduces the risk only marginally. Therefore, a significant risk (residual risk) remains that is often not perceived (CRED, 2009). Residual risk is defined as the risk that remains, even when effective disaster risk reduction measures are in place, and for which emergency response and recovery capacities must be maintained (UNISDR, 2009; Fiori et al., 2023)”.**

Regarding the recency bias, we will modify the sentence at line 130 as follows:

“Recency bias: Overemphasizing the importance of recent events, e.g. associating a higher probability of occurrence with more recent events, even when information of large past events is available”.

*Section 3, line 151f.: The decision of whether or not to prepare for an event is not necessarily (or only) a political one. Fellows from social sciences have a long tradition in studying the willingness of homeowners to prepare for undesirable events by e.g. local structural protection or retrofitting of elements at risk. Examples from Europe include but are not limited to the overview of Kuhlicke (2020) or Attems et al. (2020). As such, the authors may wish to expand their vision here.*

In our manuscript we emphasized at 159 – 161 that “Similar behavioural patterns are found at the level of individual households and businesses. Individuals show boundedly rational behaviour (Aerts et al., 2018). They overestimate their risk directly after a flood, but underestimate risk in periods without flood experience and tend to postpone mitigation measures.” However, we recognize that the train of thoughts in Section 3.3 needs to be revised to make it more coherent. We propose to modify the Section as follows (lines 150-164):

“There are numerous socio-economic reasons for the belief that an event is impossible, or for not being fully prepared, including psychological, political and economic reasons. In fact, “Individuals show boundedly rational behaviour” (Aerts et al., 2018). They tend to overestimate their risk directly after a flood, but underestimate risk in periods without flood experience and tend to postpone mitigation measures, e.g. constructing flood-proof windows or storing keepsakes and important documents on upper floors (see the overview of Kuhlicke, 2020). The decision of whether or not to prepare communities for an event, and thus to not consider it impossible, is also part of a political strategy, since it involves costs to the community. It is a decision that is often unpopular because it does not translate into immediate benefits to citizens but into immediate costs. It is also a matter of preparing for a rare event that is unlikely to occur in the short span of an administrative term. The management of such decisions, from a political point of view, also entails a cost in terms of visibility and personal popularity, and is therefore unprofitable for the political entity that has to promote and approve it. This is the reason why these decisions are often postponed until the next term of administrators. Exceptions are the circumstances immediately following a tragedy, as numerous recent flood defense actions demonstrate. In fact, governments tend to show reactive behaviour and respond as soon as a disastrous event has occurred instead of behaving proactively (Haer et al., 2019). Even when the political will to intervene arises, it is often problematic to intervene due to a lack of resources. This problem is obviously more common in countries with large public debt.”

*Section 4, the concept of risk: Surprisingly the authors make a distinction here between “economic risk” (eqn. 1) and “social risk (eqn. 2), which is not made clear in the text. Consistent with ISO Guide 73 and ISO 14091 (International Standards Organisation, 2009, 2021) and the UN/IDRR terminology on disaster risk reduction (UNISDR, 2017), risk is defined as “potential loss of life, injury, or destroyed or damaged assets which could occur to a system, society or a community in a specific period of time, determined probabilistically as a function of hazard, exposure, vulnerability and capacity”. As such, exposure (line 201) cannot be defined as “the economic damage caused by an event”, it should be the overall value of exposed elements at risk, reduced by the damage ratio (as a factor coming from the vulnerability part of the risk equation). Having said this it remains unclear what is meant by “social exposure” (line 206), and how social vulnerability can be conceptualised here (see e.g., Sorg et al., 2018; Spielman et al., 2020).*

Indeed, we suggest that social risk is assessed by using non-economic measures, to avoid that an economic value is associated to intangible values (see Koks et al. (2017) which we would like to cite in a revised version of the manuscript). In particular, we believe that associating an economic value to human life is inappropriate for extreme catastrophes that may cause a large number of life

losses. We agree that our motivation to assess economic and social risk separately has not been discussed in the text. Therefore, we propose to modify the wording in section 4 (line 189 and following ones) as follows:

“In order to understand the peculiarity of this situation, it is necessary to recall that risk is defined as potential loss of life, injury, or destroyed or damaged assets which could occur to a system, society or a community in a specific period of time, determined probabilistically as a function of hazard, exposure, and vulnerability (UNISDR, 2017; Klijn et al., 2015). Catastrophic and unexpected events may involve multiple and diverse losses of tangible and intangible values. In particular, associating a monetary price to human life and other social values like cultural heritage may be not advisable when assessing the risk associated to large disasters, as there might be significant moral and ethical implications (Kellert, 1996; Kuchyňa, 2015). Moreover, social vulnerability is recognised to play a relevant and specific role in flood risk management. It may assume a diverse set of spatially and temporally variable connotations (Koks et al., 2015) thus suggesting that its assessment is separated from that of physical vulnerability. Accordingly, we propose here to assess economic risk and social risk separately.”

Furthermore, we propose to clarify in the text how social vulnerability can be conceptualized by making reference to the work of Koks et al (2015). Accordingly, we propose to modify the text at lines 200 and 201 as follows:

“The expected social risk, ES, can be estimated as

$$ES = \int_{x_d}^{\infty} p(x)V_s(x)E_s(x)dx$$

where  $x$  and  $p(x)$  have the same meaning as in Eq. (1), and  $V_s(x)$  and  $E_s(x)$  are social vulnerability and social exposure, respectively, measured with appropriate units. For instance, Tate et al. (2021) estimated social exposure in terms of number of people exposed to flooding. In general,  $V_s(x)$  and  $E_s(x)$  can be estimated based on social features and behaviors (Koks et al., 2017; Sorg et al., 2018; Spielman et al., 2020).

*Section 4, lines 2019ff.: The authors argue that exposure and vulnerability will be extremely high in case of “impossible flood events” – which is not a contradiction of the risk concept. It depends on the way risk is expressed, in terms of annual risk as in many cost-benefit analyses (then risk is relatively small) or in terms of probable maximum loss (then the values are relatively high). The authors may wish to expand their vision here.*

We thank the reviewer for the suggestion. We may reword the text at lines 220-222 as follows:

“In other words, should the event occur, the economic and especially the social damage, including loss of life, could be enormous. Therefore, rather than relying on its very low probability through the risk equation, it may be appropriate to take into account risk aversion, which implies that communities may be willing to adopt policies to mitigate the damage caused by very extreme events irrespective of their low probability (Kind et al., 2016). In such cases, it might be advisable to refer to the probable maximum loss, which is widely used in the insurance sector, defined as the largest loss that an insurance company might face”

*The same is valid for their argumentation in line 360ff. on levees, increasing exposure and vulnerability. It is not made clear why “vulnerability is small” if exposure increases behind a levee – social vulnerabilities may be the same or even higher, economic vulnerabilities depend on the susceptibility of elements at risk (as physical vulnerability does), and the institutional dimension of vulnerability may even be higher (see e.g. the discussion in Papathoma-Köhle et al. (2021)). The authors are kindly invited to clarify their statement.*

We define vulnerability as (see text in the manuscript at line 197) “as the degree of protection of the assets exposed to the risk which varies from 0 to 1”. According to the above definition, a levee

implies a reduced vulnerability (provided the levee is not overtopped), regardless of the exposure behind the levee. To better clarify the concept we may modify the text at lines 361 and 362 as follows:

“When a levee is built, the ensuing development increases exposure behind the levee also for small floods. However, this is not a problem because vulnerability is small, as the presence of the levee increases the degree of protection of the land behind the levee. It is only beyond the design flood of a levee that the increased exposure combines with increased vulnerability, leading to an overall large increase in risk.”

Once again, we would like to thank the reviewer for the very constructive assessment and suggestions.

## References

- Aerts, J. C., Botzen, W. J., Clarke, K. C., Cutter, S. L., Hall, J. W., Merz, B., ... , and Kunreuther, H.: Integrating human behaviour dynamics into flood disaster risk assessment, *Nature Climate Change*, 8(3), 193-199, 2018.
- Albano, C. M., Dettinger, M. D., McCarthy, M. I., Schaller, K. D., Welborn, T. L., and Cox, D. A.: Application of an extreme winter storm scenario to identify vulnerabilities, mitigation options, and science needs in the Sierra Nevada mountains, USA, *Natural Hazards*, 80(2), 879-900. doi:10.1007/s11069-015-2003-4, 2016.
- Attems, M.-S., Thaler, T., Genovese, E., and Fuchs, S.: Implementation of property level flood risk adaptation (PLFRA) measures: choices and decisions, *WIREs Water*, 7, e1404, <https://doi.org/10.1002/wat2.1404>, 2020.
- Blöschl, G., Hall, J., Viglione, A., Perdigão, R. A. P., Parajka, J., Merz, B., Lun, D., Arheimer, B., Aronica, G. T., Bilibashi, A., Boháč, M., Bonacci, O., Borga, M., Čanjevac, I., Castellarin, A., Chirico, G. B., Claps, P., Frolova, N., Ganora, D., Gorbachova, L., Gül, A., Hannaford, J., Harrigan, S., Kireeva, M., Kiss, A., Kjeldsen, T. R., Kohnová, S., Koskela, J. J., Ledvinka, O., Macdonald, N., Mavrova-Guirguinova, M., Mediero, L., Merz, R., Molnar, P., Montanari, A., Murphy, C., Osuch, M., Ovcharuk, V., Radevski, I., Salinas, J. L., Sauquet, E., Šraj, M., Szolgay, J., Volpi, E., Wilson, D., Zaimi, K., and Živković, N.: Changing climate both increases and decreases European river floods, *Nature*, 573, 108-111, <https://doi.org/10.1038/s41586-019-1495-6>, 2019.
- Blöschl, G.: Three hypotheses on changing river flood hazards, *Hydrology and Earth System Sciences*, 26, 5015–5033, <https://doi.org/10.5194/hess-26-5015-2022>, 2022.
- Commission of the European Communities: Directive 2007/60/EC of the European Parliament and of the Council of 23 October 2007 on the assessment and management of flood risks, *Official Journal of the European Union*, L 288, 27-34, 2007.
- Fiori, A., Mancini, C. P., Annis, A., Lollai, S., Volpi, E., Nardi, F., and Grimaldi, S.: The role of residual risk on flood damage assessment: A continuous hydrologic-hydraulic modelling approach for the historical city of Rome, Italy. *Journal of Hydrology: Regional Studies*, 49, 101506, 2023.
- Haer, T., Botzen, W. J. W., and Aerts, J. C. J. H.: Advancing disaster policies by integrating dynamic adaptive behaviour in risk assessments using an agent-based modelling approach, *Environmental Research Letters*, 14(4), 044022. doi:10.1088/1748-9326/ab0770, 2019.
- International Standards Organisation: ISO Guide 73: Risk management – vocabulary, Geneva, 15 pp., 2009.

- Kellert, S. R.: The value of life: biological diversity and human society. Island press, 1996.
- Kind, J., Wouter Botzen, W. J. W. and Aerts, J. C. J. H.: Accounting for risk aversion, income distribution and social welfare in cost–benefit analysis for flood risk management. *WIREs Clim. Change* 8, e446, 2017.
- Klijn, F., Kreibich, H., De Moel, H., and Penning-Rowsell, E.: Adaptive flood risk management planning based on a comprehensive flood risk conceptualisation, *Mitigation and Adaptation Strategies for Global Change*, 20 (6), 845-864, 2015.
- Koks, E. E., Jongman, B., Husby, T. G. and Botzen, W. J. W.: Combining hazard, exposure and social vulnerability to provide lessons for flood risk management. *Env. Sci. Policy* 47, 42–52, 2015.
- Kuchyňa, P. (2015). : Problems associated with value of life. *Procedia Economics and Finance*, 25, 378-385, 2015.
- Kuhlicke, C., Seebauer, S., Hudson, P., Begg, C., Bubeck, P., Dittmer, C., Grothmann, T., Heidenreich, A., Kreibich, H., Lorenz, D. F., Masson, T., Reiter, J., Thaler, T., Thieken, A. H., and Bamberg, S.: The behavioral turn in flood risk management, its assumptions and potential implications, *WIREs Water*, 7, e1418, <https://doi.org/10.1002/wat2.1418>, 2020.
- Merz, B., Basso, S., Fischer, S., Lun, D., Blöschl, G., Merz, R., et al.: Understanding heavy tails of flood peak distributions, *Water Resources Research*, 58, e2021WR030506, 2022.
- Papathoma-Köhle, M., Thaler, T., and Fuchs, S.: An institutional approach to vulnerability: evidence from natural hazard management in Europe, *Environmental Research Letters*, 16, 044056, <https://doi.org/10.1088/1748-9326/abe88c>, 2021.
- Sofia, G., Roder, G., Dalla Fontana, G., and Tarolli, P.: Flood dynamics in urbanised landscapes: 100 years of climate and humans’ interaction, *Scientific Reports*, 7, 40527, <https://doi.org/10.1038/srep40527>, 2017.
- Sorg, L., Medina, N., Feldmeyer, D., Sanchez, A., Vojinovic, Z., Birkmann, J., and Marchese, A.: Capturing the multifaceted phenomena of socioeconomic vulnerability, *Natural Hazards*, 92, 257-282, <https://doi.org/10.1007/s11069-018-3207-1>, 2018. Spielman, S. E., Tuccillo, J., Folch, D. C., Schweikert, A., Davies, R., Wood, N., and Tate, E.: Evaluating social vulnerability indicators: criteria and their application to the Social Vulnerability Index, *Natural Hazards*, 100, 417-436, <https://doi.org/10.1007/s11069-019-03820-z>, 2020.
- Spielman, S. E., Tuccillo, J., Folch, D. C., Schweikert, A., Davies, R., Wood, N., and Tate, E.: Evaluating social vulnerability indicators: criteria and their application to the Social Vulnerability Index, *Natural Hazards*, 100, 417-436, <https://doi.org/10.1007/s11069-019-03820-z>, 2020.
- Tate, E., Rahman, M. A., Emrich, C. T., and Sampson, C. C.: Flood exposure and social vulnerability in the United States. *Natural Hazards*, 106(1), 435-457, 2021.
- UNISDR: Terminology on disaster risk reduction, United Nations Office for Disaster Risk Reduction, Geneva, 2017.
